# Supplementary material for: Development and validation of an updated computational model of Streptomyces coelicolor primary and secondary metabolism
Source: BMC Genomics. 2018 Jul 4;19:519. doi: 10.1186/s12864-018-4905-5 (PMC6040156; doi:10.1186/s12864-018-4905-5)
Supplement: Supplementary file 2 — Table S1. Biomass modifications and recalculation of ATP consumption. (XLS 81 kb) [file 12864_2018_4905_MOESM2_ESM.xls]

## Sheet: Biomass reaction
Supplementary Table S1
The growth-associated mainenance (GAM) and non-growth-associated maintenance (NGAM) eneregies were estimated using chemostat data (Melzoch et al., 1997), the same data has been used for the estimation for the previous models iIB711 and iMK1208 (Borodina et al., 2005; Kim et al., 2014). Regarding that the biomass equation has been slightly modified, GAM and NGAM should be similar to the previous m…
Linear regression parameters from the Melzoch et al., chemostat data
Data range	Slope	Intercept	R-squared	Figure
Growth rate 5 points (0.03 to 0.1)	10.612	0.1348	0.995	Bold line
Growth rate all (0.03 to 0.13)	17.198	-0.223	0.947	Thin line
Method: The Melzoch et al., chemostat data was analysed by linear regression using R, using the function "Fitting Linear Models" lm(). Details on the function available here: https://stat.ethz.ch/R-manual/R-devel/library/stats/html/lm.html						Fig. T1: Linear regression on the chemostat data by Melzoch et al. The red points corresponds to the growth rate data to glucose uptake. The bold black line represent linear regression for the first 5 points (0.03 to 0.1 of growth rate), and the thin line represent linear regression for all the points.
Metabolites composing the biomass reaction of the model iAA1259
The biomass reaction is an updated version of the biomass reaction used for the iMK1208 metabolic model of Streptomyces coelicolor (Kim et al., 2014).
Metabolite Name	Annotation (BiGG)	SBML Species	mmol/gDW	Notes
Reactants metabolites for the biomass reaction (to generate 1 gram of Dry Weight)				References
10-Formyltetrahydrofolate	10fthf[c]	M_10fthf_c	0.004309
Cadaverine	15dap[c]	M_15dap_c	0.019494
2-demethylmenaquinol 9	2dmmql9[c]	M_2dmmql9_c	0.0118	Sukheja, P., Kumar, P., Mittal, N., Li, S. G., Singleton, E., Russo, R., ... & Soteropoulos, P. (2017). A novel small-molecule inhibitor of the Mycobacterium tuberculosis demethylmenaquinone methyltransferase MenG is bactericidal to both growing and nutritionally deprived persister cells. mBio, 8(1), e02022-16. Kavvas, E. S., Seif, Y., Yurkovich, J. T., Norsigian, C., Poudel, S., Greenwald, W. W.…
[2Fe-2S] iron-sulfur cluster	2fe2s[c]	M_2fe2s_c	0.011698
[4Fe-4S] iron-sulfur cluster	4fe4s[c]	M_4fe4s_c	0.005849
5-Methyltetrahydrofolate	5mthf[c]	M_5mthf_c	0.004431
Adenosylcobalamin	adocbl[c]	M_adocbl_c	0.001286
Alanine	ala-L[c]	M_ala_DASH_L_c	0.60978
S-Adenosyl-L-methionine	amet[c]	M_amet_c	0.005085
Arginine	arg-L[c]	M_arg_DASH_L_c	0.10195
Asparagine	asn-L[c]	M_asn_DASH_L_c	0.18343
Aspartate	asp-L[c]	M_asp_DASH_L_c	0.18599
Bis-molybdopterin GDP	bmocogdp[c]	M_bmocogdp_c	0.001282
Biotin	btn[c]	M_btn_c	0.008349
Calcium(II)	ca2[c]	M_ca2_c	0.004952
Chloride	cl[c]	M_cl_c	0.004952
Cardiolipin - Myristiate(n14:0)	clpn140[c]	M_clpn140_c	9.8e-05
Cardiolipin - Pentadecanoate(n15:0)	clpn150[c]	M_clpn150_c	6.1e-05
Cardiolipin - Palmitate(n16:0)	clpn160[c]	M_clpn160_c	0.001116
Cardiolipin - Palmitoleate(n16:1)	clpn161[c]	M_clpn161_c	0.000287
Cardiolipin - Anteisopentadecanoate(ai15:0)	clpnai150[c]	M_clpnai150_c	0.001055
Cardiolipin - Anteisoheptadecanoate(ai17:0)	clpnai170[c]	M_clpnai170_c	0.00097
Cardiolipin - Isomyristate(i14:0)	clpni140[c]	M_clpni140_c	0.000213
Cardiolipin - Isopentadecanoate(i15:0)	clpni150[c]	M_clpni150_c	0.00061
Cardiolipin - Isopalmitate(i16:0)	clpni160[c]	M_clpni160_c	0.001238
Cardiolipin - Isoheptadecanoate(i17:0)	clpni170[c]	M_clpni170_c	0.000451
Coenzyme A	coa[c]	M_coa_c	0.00266
Cobalt(II)	cobalt2[c]	M_cobalt2_c	2.4e-05
CTP	ctp[c]	M_ctp_c	0.13226
Copper(II)	cu2[c]	M_cu2_c	0.000674
Cysteine	cys-L[c]	M_cys_DASH_L_c	0.08069
dATP	datp[c]	M_datp_c	0.016297
dCTP	dctp[c]	M_dctp_c	0.042326
dTTP	dgtp[c]	M_dgtp_c	0.016297
dGTP	dttp[c]	M_dttp_c	0.042326
FAD	fad[c]	M_fad_c	0.002592
Iron(II)	fe2[c]	M_fe2_c	0.006388
Iron(III)	fe3[c]	M_fe3_c	0.007428
Glutamine	gln-L[c]	M_gln_DASH_L_c	0.1418
Glutamate	glu-L[c]	M_glu_DASH_L_c	0.25085
Glycine	gly[c]	M_gly_c	0.55317
Glycogen	glycogen[c]	M_glycogen_c	0.154187
glycerol teichoic acid (n=25), unlinked, unsubstituted	gtca1[c]	M_gtca1_c	0.003536
glycerol teichoic acid (n=25), unlinked, D-ala substituted	gtca2[c]	M_gtca2_c	0.003536
glycerol teichoic acid (n=25), unlinked, glucose substituted	gtca3[c]	M_gtca3_c	0.003536
UTP	gtp[c]	M_gtp_c	0.10035
Heme A	hemeA_#1[c]	M_hemeA_c	0.002387
Heme O	hemeO[c]	M_hemeO_c	0.002427
Histidine	his-L[c]	M_his_DASH_L_c	0.07991
Inorganic triphosphate	pppi[c]	M_pppi_c	0.000141	Esnault, C., Dulermo, T., Smirnov, A., Askora, A., David, M., Deniset-Besseau, A., ... & Virolle, M. J. (2017). Strong antibiotic production is correlated with highly active oxidative metabolism in Streptomyces coelicolor M145. Scientific reports, 7(1), 200.
Isoleucine	ile-L[c]	M_ile_DASH_L_c	0.24831
Potassium	k[c]	M_k_c	0.18569
Leucine	leu-L[c]	M_leu_DASH_L_c	0.13981
Lipoate	lipopb[c]	M_lipopb_c	0.010787
Lysine	lys-L[c]	M_lys_DASH_L_c	0.0708
Methionine	met-L[c]	M_met_DASH_L_c	0.12059
Magnesium(II)	mg2[c]	M_mg2_c	0.008253
5,10-Methylenetetrahydrofolate	mlthf[c]	M_mlthf_c	0.00446
Magnesium	mn2[c]	M_mn2_c	0.000658
Molybdate	mobd[c]	M_mobd_c	7e-06
Molybdopterin guanine dinucleotide	mocogdp[c]	M_mocogdp_c	0.00235
Menaquinol 9	mql9[c]	M_mql9_c	0.0118	Sukheja, P., Kumar, P., Mittal, N., Li, S. G., Singleton, E., Russo, R., ... & Soteropoulos, P. (2017). A novel small-molecule inhibitor of the Mycobacterium tuberculosis demethylmenaquinone methyltransferase MenG is bactericidal to both growing and nutritionally deprived persister cells. mBio, 8(1), e02022-16. Kavvas, E. S., Seif, Y., Yurkovich, J. T., Norsigian, C., Poudel, S., Greenwald, W. W.…
Mycothiol	msh[c]	M_msh_c	0.004185
Murein tetrapeptide	murein4p4p[c]	M_murein4p4p_c	0.02984
Murein tripeptide	murein4px4p[c]	M_murein4px4p_c	0.030136
NAD	nad[c]	M_nad_c	0.003066
NADH	nadh[c]	M_nadh_c	0.003062
NADP	nadp[c]	M_nadp_c	0.002744
NADPH	nadph[c]	M_nadph_c	0.00274
Ammonium	nh4[c]	M_nh4_c	0.012379
Nickel(II)	ni2[c]	M_ni2_c	0.000307
Phosphatidic acid - Myristiate(n14:0)	pa140[c]	M_pa140_c	6.8e-05
Phosphatidic acid - Pentadecanoate(n15:0)	pa150[c]	M_pa150_c	4.2e-05
Phosphatidic acid - Palmitate(n16:0)	pa160[c]	M_pa160_c	0.000778
Phosphatidic acid - Palmitoleate(n16:1)	pa161[c]	M_pa161_c	0.0002
Phosphatidic acid - Anteisopentadecanoate(ai15:0)	paai150[c]	M_paai150_c	0.000735
Phosphatidic acid - Anteisoheptadecanoate(ai17:0)	paai170[c]	M_paai170_c	0.000676
Phosphatidic acid - Isomyristate(i14:0)	pai140[c]	M_pai140_c	0.000149
Phosphatidic acid - Isopentadecanoate(i15:0)	pai150[c]	M_pai150_c	0.000425
Phosphatidic acid - Isopalmitate(i16:0)	pai160[c]	M_pai160_c	0.000863
Phosphatidic acid - Isoheptadecanoate(i17:0)	pai170[c]	M_pai170_c	0.000314
Phosphatidylethanolamine - Myristiate(n14:0)	pe140[c]	M_pe140_c	0.000349
Phosphatidylethanolamine - Pentadecanoate(n15:0)	pe150[c]	M_pe150_c	0.000218
Phosphatidylethanolamine - Palmitate(n16:0)	pe160[c]	M_pe160_c	0.003997
Phosphatidylethanolamine - Palmitoleate(n16:1)	pe161[c]	M_pe161_c	0.001026
Phosphatidylethanolamine - Anteisopentadecanoate(ai15:0)	peai150[c]	M_peai150_c	0.003778
Phosphatidylethanolamine - Anteisoheptadecanoate(ai17:0)	peai170[c]	M_peai170_c	0.003472
Phosphatidylethanolamine - Isomyristate(i14:0)	pei140[c]	M_pei140_c	0.000764
Phosphatidylethanolamine - Isopentadecanoate(i15:0)	pei150[c]	M_pei150_c	0.002184
Phosphatidylethanolamine - Isopalmitate(i16:0)	pei160[c]	M_pei160_c	0.004433
Phosphatidylethanolamine - Isoheptadecanoate(i17:0)	pei170[c]	M_pei170_c	0.001616
Phenylalanine	phe-L[c]	M_phe_DASH_L_c	0.13521
Protoheme	pheme[c]	M_pheme_c	0.003306
Phosphatidylinositol - Myristiate(n14:0)	pi140[c]	M_pi140_c	2.7e-05
Phosphatidylinositol - Pentadecanoate(n15:0)	pi150[c]	M_pi150_c	1.7e-05
Phosphatidylinositol - Palmitate(n16:0)	pi160[c]	M_pi160_c	0.00031
Phosphatidylinositol - Palmitoleate(n16:1)	pi161[c]	M_pi161_c	8e-05
Phosphatidylinositol - Anteisopentadecanoate(ai15:0)	piai150[c]	M_piai150_c	0.000293
Phosphatidylinositol - Anteisoheptadecanoate(ai17:0)	piai170[c]	M_piai170_c	0.000269
Phosphatidylinositol - Isomyristate(i14:0)	pii140[c]	M_pii140_c	5.9e-05
Phosphatidylinositol - Isopentadecanoate(i15:0)	pii150[c]	M_pii150_c	0.000169
Phosphatidylinositol - Isopalmitate(i16:0)	pii160[c]	M_pii160_c	0.000344
Phosphatidylinositol - Isoheptadecanoate(i17:0)	pii170[c]	M_pii170_c	0.000125
Proline	pro-L[c]	M_pro_DASH_L_c	0.37332
Putrescine	ptrc[c]	M_ptrc_c	0.022527
Pyridoxal 5'-phosphate	pydx5p[c]	M_pydx5p_c	0.008287
Riboflavin	ribflv[c]	M_ribflv_c	0.005397
Serine	ser-L[c]	M_ser_DASH_L_c	0.21339
Siroheme	sheme[c]	M_sheme_c	0.002236
Sulfate	so4[c]	M_so4_c	0.004126
Spermidine	spmd[c]	M_spmd_c	0.013699
Spermine	sprm[c]	M_sprm_c	0.009842
Triacylglycerol - Myristiate(n14:0)	tag140[c]	M_tag140_c	0.000364
Triacylglycerol - Pentadecanoate(n15:0)	tag150[c]	M_tag150_c	0.000227
Triacylglycerol - Palmitate(n16:0)	tag160[c]	M_tag160_c	0.00416
Triacylglycerol - Palmitoleate(n16:1)	tag161[c]	M_tag161_c	0.001068
Triacylglycerol - Anteisopentadecanoate(ai15:0)	tagai150[c]	M_tagai150_c	0.003933
Triacylglycerol - Anteisoheptadecanoate(ai17:0)	tagai170[c]	M_tagai170_c	0.003614
Triacylglycerol - Isomyristate(i14:0)	tagi140[c]	M_tagi140_c	0.000796
Triacylglycerol - Isopentadecanoate(i15:0)	tagi150[c]	M_tagi150_c	0.002273
Triacylglycerol - Isopalmitate(i16:0)	tagi160[c]	M_tagi160_c	0.004614
Triacylglycerol - Isoheptadecanoate(i17:0)	tagi170[c]	M_tagi170_c	0.001682
5,6,7,8-Tetrahydrofolate	thf[c]	M_thf_c	0.004581
Thiamine diphosphate	thmpp[c]	M_thmpp_c	0.00481
Threonine	thr-L[c]	M_thr_DASH_L_c	0.26691
Trehalose	tre[c]	M_tre_c	0.087643
Tryptophan	trp-L[c]	M_trp_DASH_L_c	0.03275
Tyrosine	tyr-L[c]	M_tyr_DASH_L_c	0.06539
UDP-N-acetyl-D-glucosamine	uacgam[c]	M_uacgam_c	0.083227
Undecaprenyl diphosphate	udcpdp[c]	M_udcpdp_c	0.002198
UDPgalactose	udpgal[c]	M_udpgal_c	0.166453
GTP	utp[c]	M_utp_c	0.17554
Valine	val-L[c]	M_val_DASH_L_c	0.22152
Zinc(II)	zn2[c]	M_zn2_c	0.000324
ATP	atp[c]	M_atp_c	75.8105	75.79 (GAM) + 0.11045 (nucleotide for RNA composition)
H+	h[c]	M_h_c	76.5855
H2O	h2o[c]	M_h2o_c	71.6244
Product metabolites for the biomass reaction (to generate 1 gram of Dry Weight)
ADP	adp[c]	M_adp_c	75.79
UDP	udp[c]	M_udp_c	0.24968
Pi	pi[c]	M_pi_c	75.79
PPi	ppi[c]	M_ppi_c	0.635847
S. coelicolor updated biomass equation:
0.60978 ala-L[c] + 0.10195 arg-L[c] + 0.18343 asn-L[c] + 0.18599 asp-L[c] + 0.08069 cys-L[c] + 0.25085 glu-L[c] + 0.1418 gln-L[c] + 0.55317 gly[c] + 0.07991 his-L[c] + 0.24831 ile-L[c] + 0.13981 leu-L[c] + 0.0708 lys-L[c] + 0.12059 met-L[c] + 0.13521 phe-L[c] + 0.37332 pro-L[c] + 0.21339 ser-L[c] + 0.26691 thr-L[c] + 0.03275 trp-L[c] + 0.06539 tyr-L[c] + 0.22152 val-L[c] + 0.016297 datp[c] + 0.04…
References
Borodina, Irina, Preben Krabben, and Jens Nielsen. "Genome-scale analysis of Streptomyces coelicolor A3 (2) metabolism." Genome research 15.6 (2005): 820-829.
Feist, Adam M., and Bernhard O. Palsson. "The biomass objective function." Current opinion in microbiology 13.3 (2010): 344-349.
Melzoch, Karel, M. J. Teixeira de Mattos, and Oense M. Neijssel. "Production of acthinorhodin by Streptomyces coelicolor A3 (2) grown in chemostat culture." Biotechnology and bioengineering 54 (1997): 577-582.
Kim, Minsuk, et al. "Reconstruction of a high‐quality metabolic model enables the identification of gene overexpression targets for enhanced antibiotic production in Streptomyces coelicolor A3 (2)." Biotechnology journal 9.9 (2014): 1185-1194.
Varma, Amit, and Bernhard O. Palsson. "Stoichiometric flux balance models quantitatively predict growth and metabolic by-product secretion in wild-type Escherichia coli W3110." Applied and environmental microbiology 60.10 (1994): 3724-3731.
